# Supplementary material for: Bark Beetles Utilize Ophiostomatoid Fungi to Circumvent Host Tree Defenses
Source: MDPI journal article supplement (doi:10.3390/metabo13020239), 2023-02-06
Supplement: s1 [file s1]

Table S1: Emission of volatile organic compounds identified from the headspace collection of fresh pine bark, fourteen days after inoculation with different fungi. Analyses were conducted using GC-MS.

|                                | RT <sup>#</sup> | Concentrations of compounds (ng per mg dry weight of bark) |                 |                     |                 |                         |                 |                   |                 |
|--------------------------------|-----------------|------------------------------------------------------------|-----------------|---------------------|-----------------|-------------------------|-----------------|-------------------|-----------------|
|                                |                 | Uninfected                                                 |                 | <i>G. clavigera</i> |                 | <i>L. longiclavatum</i> |                 | <i>O. montium</i> |                 |
|                                |                 | Day 0                                                      | Day 14          | Day 0               | Day 14          | Day 0                   | Day 14          | Day 0             | Day 14          |
| <i>Monoterpenes</i>            |                 |                                                            |                 |                     |                 |                         |                 |                   |                 |
| Tricyclene                     | 8.8             | ND                                                         | 0.51 ± 0.51     | ND                  | 2.14 ± 1.15     | ND                      | 3.69 ± 2.54     | ND                | 2.11 ± 1.12     |
| α-Pinene                       | 9.24            | 225.1 ± 79.3                                               | 284.40 ± 60.98  | 173.90 ± 40.85      | 370 ± 55.29     | 224.20 ±68.63           | 784.20 ± 247.10 | 149.80 ± 31.81    | 393.70 ± 94.95  |
| Camphene                       | 9.91            | 36.59 ± 13.61                                              | 40.09 ± 8.93    | 25.71 ± 4.55        | 49.62 ± 7.90    | 28.95 ±6.67             | 95.28 ± 27.86   | 21.13 ± 3.44      | 47.92 ± 9.36    |
| Sabinene                       | 10.96           | ND                                                         | 7.76 ± 2.43     | ND                  | 8.38 ± 2.92     | ND                      | 9.25 ± 2.67     | ND                | 9.24 ± 3.08     |
| β-Pinene                       | 11.09           | 131.60 ± 38.24                                             | 221.50 ± 31.54  | 113.70 ± 20.44      | 297.70 ± 27.74  | 145.70 ±34.82           | 440.10 ± 110.60 | 97.39 ± 15.04     | 325.40 ± 58.52  |
| Myrcene                        | 11.64           | 48.52 ± 7.34                                               | 110.90 ± 26.76  | 60.46 ± 10.65       | 163.40 ± 49.49  | 69.36 ±12.52            | 182.90 ± 35.19  | 47.77 ± 6.84      | 138.20 ± 38.24  |
| 3-Carene                       | 12.36           | 108.4 ± 32.34                                              | 610.80 ± 217.10 | 190.40 ± 65.65      | 888.40 ± 338.20 | 206.70 ±71.57           | 590.20 ± 214.60 | 154.60 ± 44.12    | 684.40 ± 266.80 |
| α-Terpinene                    | 12.71           | 8.53 ± 1.05                                                | 15.21 ± 3.94    | 21.85 ± 3.89        | 23.19 ± 7.14    | 17.28 ±3.69             | 21.63 ± 4.69    | 11.91 ± 2.18      | 19.67 ± 6.72    |
| α-Phellandrene                 | 12.29           | 37.46 ± 4.72                                               | 99.29 ± 38.85   | 78.18 ± 14.76       | 106.10 ± 38.65  | 69.87 ±14.56            | 103.60 ± 20.63  | 46.05 ± 7.86      | 64.78 ± 21.35   |
| Cymene                         | 13.05           | 2.40 ± 1.47                                                | 14.36 ± 3.74    | 1.748 ± 0.58        | 21.19 ± 5.60    | 1.96 ±0.47              | 19.52 ± 3.54    | 0.97 ± 0.41       | 17.45 ± 4.63    |
| Limonene                       | 13.19           | 131 ± 36.29                                                | 230.70 ± 33.71  | 121 ± 12.20         | 320.40 ± 58.26  | 146.20 ±24.67           | 510.20 ± 115.20 | 102.50 ± 12.58    | 291.10 ± 48.00  |
| β-Phellandrene                 | 13.25           | 657.80 ± 72.69                                             | 1621 ± 416.00   | 834.90 ± 155.80     | 2292 ± 695.00   | 972.50 ±177.60          | 2530 ± 496.50   | 686.30 ± 104.40   | 1933 ± 546.40   |
| γ-Terpinene                    | 14.32           | 4.21 ± 0.60                                                | 11.64 ± 3.28    | 6.82 ± 1.51         | 18.52 ± 6.15    | 6.93 ±1.63              | 19.60 ± 3.43    | 5.09 ± 0.98       | 16.14 ± 5.31    |
| Terpinolene                    | 15.30           | 13.71 ± 3.19                                               | 45.00 ± 15.31   | 23.11 ± 6.98        | 71.61 ± 27.59   | 24.80 ±7.86             | 69.44 ± 16.83   | 18.21 ± 4.44      | 60.66 ± 23.94   |
| <i>Phenylproprenes</i>         |                 |                                                            |                 |                     |                 |                         |                 |                   |                 |
| Allylanisole-4-ol              | 19.12           | 11.86 ± 1.73                                               | 17.44 ± 6.54    | 8.31 ± 1.09         | 17.28 ± 4.12    | 10.39 ±1.96             | 28.50 ± 5.36    | 8.96 ± 0.72       | 20.02 ± 5.33    |
| Methyl eugenol                 | 24.46           | ND                                                         | 1.59 ± 0.78     | ND                  | 2.19 ± 0.85     | ND                      | 7.67 ± 4.53     | ND                | 2.89 ± 1.50     |
| <i>Oxygenated monoterpenes</i> |                 |                                                            |                 |                     |                 |                         |                 |                   |                 |
| Camphor                        | 11.92           | ND                                                         | 1.87 ± 1.05     | ND                  | 3.73 ± 1.42     | ND                      | 7.67 ± 2.43     | ND                | 4.96 ± 1.32     |
| Linalool                       | 15.88           | 1.83 ± 0.15                                                | 2.37 ± 0.47     | 2.49 ± 0.67         | 4.13 ± 1.45     | 3.05 ±0.86              | 6.21 ± 2.37     | 2.48 ± 0.36       | 4.72 ± 1.99     |
| Borneol                        | 18.30           | ND                                                         | 10.55 ± 4.79    | ND                  | 65.39 ± 16.58   | ND                      | 60.55 ± 7.93    | ND                | 45.30 ± 10.66   |
| Terpinen-4-ol                  | 18.6            | ND                                                         | 2.38 ± 1.03     | ND                  | 13.78 ± 5.47    | ND                      | 29.29 ± 5.89    | ND                | 7.07 ± 3.35     |
| α-Terpineol                    | 19.03           | 0                                                          | 1.38 ± 0.71     | 0.83 ± 0.57         | 6.56 ± 2.40     | 1.14 ±0.76              | 12.88 ± 1.76    | 0.75 ± 0.52       | 5.64 ± 2.73     |
| Verbenone                      | 19.49           | ND                                                         | 0.44 ± 0.13     | ND                  | 0.51 ± 0.18     | ND                      | 0.17 ± 0.09     | ND                | 0.42 ± 0.24     |
| Bornyl acetate                 | 21.71           | 23.23 ± 8.46                                               | ND              | 42.52 ± 16.08       | ND              | 47.41 ±18.36            | ND              | 35.05 ± 10.53     | ND              |

|                           |        |               |              |               |              |               |               |               |              |
|---------------------------|--------|---------------|--------------|---------------|--------------|---------------|---------------|---------------|--------------|
| Citronellyl acetate       | 23.40  | ND            | 0.01 ± 0.01  | ND            | 0.01 ± 0.01  | ND            | 0.05 ± 0.02   | ND            | 0.01 ± 0.00  |
| <i>Sesquiterpenes</i>     |        |               |              |               |              |               |               |               |              |
| β-Elemene                 | 24.31  | ND            | 5.30 ± 2.57  | ND            | 8.10 ± 3.09  | ND            | 7.93 ± 3.88   | ND            | 7.77 ± 3.38  |
| β-Caryophyllene           | 24.85  | ND            | 3.44 ± 1.60  | ND            | 6.07 ± 2.45  | ND            | 8.85 ± 2.68   | ND            | 5.31 ± 2.13  |
| α-Bergamotene             | 25.08  | ND            | 8.60 ± 3.29  | ND            | 12.47 ± 3.97 | ND            | 15.32 ± 4.26  | ND            | 12.44 ± 4.20 |
| Aromadendrene             | 25.96  | 6.61 ± 0.72   | ND           | 14.72 ± 3.36  | ND           | 18.32 ± 4.43  | ND            | 12.68 ± 2.01  | ND           |
| Germacrene-4-ol           | 26.91  | 49.11 ± 10.03 | ND           | 26.87 ± 9.04  | ND           | 23.96 ± 6.54  | ND            | 35.46 ± 7.89  | ND           |
| γ-Cadinene                | 26.24  | 35.87 ± 6.60  | ND           | 41.10 ± 13.80 | ND           | 50.26 ± 10.61 | ND            | 34.53 ± 4.64  | ND           |
| δ-Cadinol                 | 27.24  | 22.13 ± 3.78  | ND           | 18.89 ± 4.84  | ND           | 31.81 ± 6.45  | ND            | 19.32 ± 3.08  | ND           |
| Guaia-6,9-diene           | 25.21  | 16.70 ± 6.67  | 32.72 ± 9.17 | 10.76 ± 3.69  | 35.30 ± 8.95 | 14.56 ± 5.58  | 82.02 ± 25.35 | 10.46 ± 3.09  | 38.84 ± 9.32 |
| δ-Cadinene                | 26.30  | 69.49 ± 12.90 | ND           | 76.71 ± 7.97  | ND           | 93.30 ± 20.00 | ND            | 71.48 ± 12.05 | ND           |
| α-Murolene                | 26.05  | 19.78 ± 3.67  | ND           | 26.01 ± 4.52  | ND           | 28.48 ± 6.18  | ND            | 19.86 ± 2.77  | ND           |
| <i>Aliphatics/ others</i> |        |               |              |               |              |               |               |               |              |
| Isobutanol                | 2.32   | ND            | 0.00 ± 0     | ND            | 1.92 ± 0.11  | ND            | 2.65 ± 0.17   | ND            | 1.93 ± 0.11  |
| 3-Methyl-2-butanone       | 2.55   | ND            | 0.50 ± 0.08  | ND            | 0.57 ± 0.02  | ND            | 0.60 ± 0.03   | ND            | 0.55 ± 0.02  |
| 1-Butanol                 | 2.593  | ND            | 0.53 ± 0.13  | ND            | 0.96 ± 0.08  | ND            | 1.12 ± 0.38   | ND            | 0.79 ± 0.34  |
| 2-Methyl-2-butanol        | 2.9    | ND            | 11.90 ± 1.57 | ND            | 14.93 ± 0.73 | ND            | 15.19 ± 0.62  | ND            | 15.94 ± 1.07 |
| Acetoin                   | 3.13   | ND            | 2.91 ± 1.25  | ND            | 3.75 ± 0.84  | ND            | 4.71 ± 0.39   | ND            | 4.97 ± 0.86  |
| 3-Methyl-1-butanol        | 3.54   | ND            | 0.50 ± 0.12  | ND            | 1.07 ± 0.32  | ND            | 1.35 ± 0.32   | ND            | 0.96 ± 0.18  |
| 2-Methyl-butanol          | 3.65   | ND            | 0.27 ± 0.07  | ND            | 0.71 ± 0.13  | ND            | 1.01 ± 0.19   | ND            | 0.41 ± 0.09  |
| 4-Methylheptane           | 4.087  | ND            | 3.44 ± 0.42  | ND            | 4.23 ± 0.28  | ND            | 4.31 ± 0.25   | ND            | 4.33 ± 0.23  |
| 2,4-Dimethyl-1-heptene    | 5.911  | ND            | 6.02 ± 0.57  | ND            | 6.46 ± 0.43  | ND            | 6.83 ± 0.49   | ND            | 6.67 ± 0.29  |
| 4-Methyloctane            | 6.68   | ND            | 0.36 ± 0.03  | ND            | 0.37 ± 0.03  | ND            | 0.39 ± 0.03   | ND            | 0.39 ± 0.02  |
| 2-Ethyl-1-butanol         | 9.802  | ND            | 0.73 ± 0.06  | ND            | 0.67 ± 0.01  | ND            | 0.68 ± 0.02   | ND            | 0.68 ± 0.02  |
| Phenethyl alcohol         | 16.37  | ND            | 0.10 ± 0.02  | ND            | 0.23 ± 0.07  | ND            | 0.68 ± 0.19   | ND            | 0.27 ± 0.05  |
| Grandisol                 | 19.6   | ND            | 0.28 ± 0.09  | ND            | 0.19 ± 0.08  | ND            | 0.04 ± 0.03   | ND            | 0.63 ± 0.22  |
| 3,4-Dimethoxyphenol       | 24.841 | ND            | 0.08 ± 0.07  | ND            | 0.19 ± 0.11  | ND            | 0.45 ± 0.18   | ND            | 0.11 ± 0.07  |

#RT: Retention time according to GC-MS analysis; ND: Not detected.

Table S2: Relative amounts (mean  $\pm$  SE, n=10) of volatiles from uninfected bark detected after various time periods (0, 14, 28 and 42 days) from the beginning of an experiment. Data from the control uninfected treatment are presented here.

| Uninfected (Control)           |                 | Concentrations of compounds (ng per mg dry weight of bark) |                    |                    |                    |
|--------------------------------|-----------------|------------------------------------------------------------|--------------------|--------------------|--------------------|
| <i>Monoterpenes</i>            | RT <sup>#</sup> | Week 0                                                     | Week 2             | Week 4             | Week 6             |
| $\alpha$ -Pinene               | 9.240           | 1.722 $\pm$ 0.798                                          | 25.258 $\pm$ 8.169 | 19.375 $\pm$ 7.447 | 4.332 $\pm$ 1.724  |
| Camphene                       | 9.910           | 0.169 $\pm$ 0.086                                          | 0.401 $\pm$ 0.135  | 0.285 $\pm$ 0.083  | 0.133 $\pm$ 0.018  |
| $\beta$ -Pinene                | 11.090          | 1.532 $\pm$ 0.524                                          | 5.604 $\pm$ 1.938  | 4.497 $\pm$ 0.920  | 2.535 $\pm$ 0.457  |
| $\beta$ -Myrcene               | 11.640          | 0.339 $\pm$ 0.081                                          | 0.976 $\pm$ 0.207  | 0.719 $\pm$ 0.089  | 0.401 $\pm$ 0.039  |
| 3-Carene                       | 12.360          | 3.690 $\pm$ 1.892                                          | 14.862 $\pm$ 5.296 | 9.408 $\pm$ 2.880  | 5.273 $\pm$ 1.551  |
| p-Cymene                       | 13.050          | 0.041 $\pm$ 0.017                                          | 0.196 $\pm$ 0.016  | 0.141 $\pm$ 0.022  | 0.074 $\pm$ 0.014  |
| Limonene                       | 13.190          | 1.397 $\pm$ 0.813                                          | 2.224 $\pm$ 0.750  | 2.348 $\pm$ 0.909  | 1.222 $\pm$ 0.407  |
| $\beta$ -Phellandrene          | 13.250          | 11.539 $\pm$ 2.971                                         | 28.471 $\pm$ 5.539 | 24.734 $\pm$ 2.477 | 17.572 $\pm$ 2.137 |
| $\gamma$ -Terpinene            | 14.320          | 0.049 $\pm$ 0.015                                          | 0.155 $\pm$ 0.045  | 0.124 $\pm$ 0.028  | 0.071 $\pm$ 0.016  |
| Terpinolene                    | 15.300          | 0.321 $\pm$ 0.108                                          | 1.126 $\pm$ 0.382  | 0.831 $\pm$ 0.219  | 0.390 $\pm$ 0.094  |
| <i>Oxygenated monoterpenes</i> |                 |                                                            |                    |                    |                    |
| Geranyl acetate                | 11.62           | 1.149 $\pm$ 0.774                                          | 1.087 $\pm$ 0.732  | 0.957 $\pm$ 0.524  | 0.734 $\pm$ 0.440  |
| Camphor                        | 11.92           | 0.005 $\pm$ 0.003                                          | 0.016 $\pm$ 0.006  | 0.007 $\pm$ 0.002  | 0.001 $\pm$ 0.000  |
| $\beta$ -ocimene               | 13.9            | 0.004 $\pm$ 0.003                                          | 0.006 $\pm$ 0.004  | 0.005 $\pm$ 0.002  | 0.005 $\pm$ 0.002  |
| Borneol                        | 18.3            | 0.021 $\pm$ 0.009                                          | 0.034 $\pm$ 0.012  | 0.034 $\pm$ 0.012  | 0.011 $\pm$ 0.003  |
| Terpinen-4-ol                  | 18.6            | 0.015 $\pm$ 0.006                                          | 0.018 $\pm$ 0.007  | 0.028 $\pm$ 0.009  | 0.017 $\pm$ 0.004  |
| $\alpha$ -Terpineol            | 19.03           | 0.015 $\pm$ 0.004                                          | 0.049 $\pm$ 0.012  | 0.040 $\pm$ 0.006  | 0.019 $\pm$ 0.005  |
| Bornyl acetate                 | 21.71           | 0.458 $\pm$ 0.376                                          | 0.599 $\pm$ 0.491  | 0.455 $\pm$ 0.316  | 0.115 $\pm$ 0.060  |
| <i>Sesquiterpenes</i>          |                 |                                                            |                    |                    |                    |
| $\beta$ -Caryophyllene         | 24.85           | 0.011 $\pm$ 0.005                                          | 0.015 $\pm$ 0.007  | 0.011 $\pm$ 0.006  | 0.008 $\pm$ 0.004  |
| Germacrene-4-ol                | 26.91           | 3.705 $\pm$ 2.387                                          | 4.388 $\pm$ 2.570  | 2.979 $\pm$ 1.686  | 2.039 $\pm$ 1.260  |
| <i>Diterpenes</i>              |                 |                                                            |                    |                    |                    |
| Epi-13-manool                  | 23.4            | 4.478 $\pm$ 1.533                                          | 3.398 $\pm$ 2.071  | 3.598 $\pm$ 1.292  | 2.255 $\pm$ 0.852  |

Table S3: Relative amounts (mean  $\pm$  SE, n=10) of volatiles from uninfected bark detected after various time periods (0, 14, 28 and 42 days) from the beginning of an experiment. Data from the control *G. clavigera* treatment are presented here.

| <i>G. clavigera</i>            |                 | Concentrations of compounds (ng per mg dry weight of bark) |                     |                     |                    |
|--------------------------------|-----------------|------------------------------------------------------------|---------------------|---------------------|--------------------|
| <i>Monoterpenes</i>            | RT <sup>#</sup> | Week 0                                                     | Week 2              | Week 4              | Week 6             |
| $\alpha$ -Pinene               | 9.240           | 0.823 $\pm$ 0.368                                          | 27.440 $\pm$ 7.648  | 11.421 $\pm$ 3.579  | 6.477 $\pm$ 1.800  |
| Camphene                       | 9.910           | 0.119 $\pm$ 0.064                                          | 2.380 $\pm$ 0.294   | 1.164 $\pm$ 0.196   | 0.320 $\pm$ 0.095  |
| $\beta$ -Pinene                | 11.090          | 0.665 $\pm$ 0.096                                          | 49.835 $\pm$ 12.396 | 23.910 $\pm$ 5.040  | 5.301 $\pm$ 1.742  |
| $\beta$ -Myrcene               | 11.640          | 0.216 $\pm$ 0.025                                          | 6.220 $\pm$ 0.881   | 3.157 $\pm$ 0.539   | 0.838 $\pm$ 0.220  |
| 3-Carene                       | 12.360          | 2.244 $\pm$ 0.812                                          | 75.335 $\pm$ 14.993 | 40.151 $\pm$ 8.915  | 10.229 $\pm$ 2.528 |
| p-Cymene                       | 13.050          | 0.025 $\pm$ 0.009                                          | 0.163 $\pm$ 0.028   | 0.150 $\pm$ 0.026   | 0.067 $\pm$ 0.014  |
| Limonene                       | 13.190          | 0.758 $\pm$ 0.304                                          | 14.796 $\pm$ 5.271  | 8.222 $\pm$ 2.998   | 2.353 $\pm$ 1.136  |
| $\beta$ -Phellandrene          | 13.250          | 8.074 $\pm$ 0.989                                          | 86.073 $\pm$ 18.769 | 91.077 $\pm$ 15.564 | 30.374 $\pm$ 7.018 |
| $\gamma$ -Terpinene            | 14.320          | 0.033 $\pm$ 0.008                                          | 0.769 $\pm$ 0.141   | 0.480 $\pm$ 0.095   | 0.127 $\pm$ 0.025  |
| Terpinolene                    | 15.300          | 0.234 $\pm$ 0.073                                          | 5.985 $\pm$ 1.246   | 3.683 $\pm$ 0.833   | 0.786 $\pm$ 0.176  |
| <i>Oxygenated monoterpenes</i> |                 |                                                            |                     |                     |                    |
| Geranyl acetate                | 11.62           | 0.825 $\pm$ 0.417                                          | 0.924 $\pm$ 0.464   | 0.660 $\pm$ 0.270   | 0.761 $\pm$ 0.405  |
| Camphor                        | 11.92           | 0.001 $\pm$ 0.001                                          | 0.015 $\pm$ 0.004   | 0.010 $\pm$ 0.004   | 0.004 $\pm$ 0.001  |
| $\beta$ -ocimene               | 13.9            | 0.003 $\pm$ 0.002                                          | 0.005 $\pm$ 0.005   | 0.005 $\pm$ 0.004   | 0.007 $\pm$ 0.003  |
| Borneol                        | 18.3            | 0.012 $\pm$ 0.004                                          | 0.080 $\pm$ 0.016   | 0.049 $\pm$ 0.009   | 0.012 $\pm$ 0.005  |
| Terpinen-4-ol                  | 18.6            | 0.008 $\pm$ 0.002                                          | 0.086 $\pm$ 0.023   | 0.096 $\pm$ 0.017   | 0.032 $\pm$ 0.006  |
| $\alpha$ -Terpineol            | 19.03           | 0.014 $\pm$ 0.003                                          | 0.210 $\pm$ 0.081   | 0.183 $\pm$ 0.053   | 0.033 $\pm$ 0.005  |
| Bornyl acetate                 | 21.71           | 0.431 $\pm$ 0.365                                          | 1.238 $\pm$ 0.818   | 0.751 $\pm$ 0.415   | 0.342 $\pm$ 0.258  |
| <i>Sesquiterpenes</i>          |                 |                                                            |                     |                     |                    |
| $\beta$ -Caryophyllene         | 24.85           | 0.005 $\pm$ 0.003                                          | 0.002 $\pm$ 0.002   | 0.008 $\pm$ 0.006   | 0.004 $\pm$ 0.004  |
| Germacrene-4-ol                | 26.91           | 2.751 $\pm$ 1.307                                          | 3.545 $\pm$ 1.782   | 2.123 $\pm$ 0.852   | 2.411 $\pm$ 1.194  |
| <i>Diterpenes</i>              |                 |                                                            |                     |                     |                    |
| Epi-13-manool                  | 23.4            | 2.160 $\pm$ 1.358                                          | 5.922 $\pm$ 3.384   | 1.952 $\pm$ 1.168   | 3.890 $\pm$ 1.593  |

Table S4: Relative amounts (mean  $\pm$  SE, n=10) of volatiles from uninfected bark detected after various time periods (0, 14, 28 and 42 days) from the beginning of an experiment. Data from the control *L. longiclavatum* treatment are presented here.

| <i>L. longiclavatum</i>        |                 | Concentrations of compounds (ng per mg dry weight of bark) |                     |                     |                    |
|--------------------------------|-----------------|------------------------------------------------------------|---------------------|---------------------|--------------------|
| <i>Monoterpenes</i>            | RT <sup>#</sup> | Week 0                                                     | Week 2              | Week 4              | Week 6             |
| $\alpha$ -Pinene               | 9.240           | 0.979 $\pm$ 0.362                                          | 19.792 $\pm$ 9.739  | 14.361 $\pm$ 6.510  | 11.136 $\pm$ 5.035 |
| Camphene                       | 9.910           | 0.106 $\pm$ 0.028                                          | 2.172 $\pm$ 0.406   | 1.185 $\pm$ 0.266   | 0.350 $\pm$ 0.073  |
| $\beta$ -Pinene                | 11.090          | 0.831 $\pm$ 0.195                                          | 47.351 $\pm$ 10.580 | 24.518 $\pm$ 5.711  | 8.724 $\pm$ 2.667  |
| $\beta$ -Myrcene               | 11.640          | 0.260 $\pm$ 0.054                                          | 6.003 $\pm$ 1.021   | 3.188 $\pm$ 0.678   | 0.990 $\pm$ 0.226  |
| 3-Carene                       | 12.360          | 4.255 $\pm$ 1.953                                          | 74.198 $\pm$ 15.568 | 43.261 $\pm$ 12.191 | 14.523 $\pm$ 4.648 |
| p-Cymene                       | 13.050          | 0.024 $\pm$ 0.006                                          | 0.225 $\pm$ 0.025   | 0.206 $\pm$ 0.035   | 0.125 $\pm$ 0.034  |
| Limonene                       | 13.190          | 0.713 $\pm$ 0.284                                          | 13.665 $\pm$ 4.926  | 7.464 $\pm$ 2.933   | 2.350 $\pm$ 0.676  |
| $\beta$ -Phellandrene          | 13.250          | 10.270 $\pm$ 1.978                                         | 97.382 $\pm$ 19.394 | 72.063 $\pm$ 16.036 | 36.702 $\pm$ 7.663 |
| $\gamma$ -Terpinene            | 14.320          | 0.054 $\pm$ 0.019                                          | 0.739 $\pm$ 0.151   | 0.524 $\pm$ 0.147   | 0.182 $\pm$ 0.053  |
| Terpinolene                    | 15.300          | 0.403 $\pm$ 0.166                                          | 5.850 $\pm$ 1.295   | 4.071 $\pm$ 1.239   | 1.146 $\pm$ 0.369  |
| <i>Oxygenated monoterpenes</i> |                 |                                                            |                     |                     |                    |
| Geranyl acetate                | 11.62           | 0.755 $\pm$ 0.430                                          | 0.667 $\pm$ 0.333   | 0.464 $\pm$ 0.204   | 0.372 $\pm$ 0.177  |
| Camphor                        | 11.92           | 0.001 $\pm$ 0.000                                          | 0.023 $\pm$ 0.011   | 0.011 $\pm$ 0.004   | 0.002 $\pm$ 0.001  |
| $\beta$ -ocimene               | 13.9            | 0.002 $\pm$ 0.002                                          | 0.001 $\pm$ 0.001   | 0.001 $\pm$ 0.001   | 0.005 $\pm$ 0.001  |
| Borneol                        | 18.3            | 0.013 $\pm$ 0.003                                          | 0.098 $\pm$ 0.028   | 0.046 $\pm$ 0.010   | 0.013 $\pm$ 0.003  |
| Terpinen-4-ol                  | 18.6            | 0.010 $\pm$ 0.005                                          | 0.093 $\pm$ 0.020   | 0.088 $\pm$ 0.023   | 0.040 $\pm$ 0.010  |
| $\alpha$ -Terpineol            | 19.03           | 0.016 $\pm$ 0.005                                          | 0.182 $\pm$ 0.058   | 0.175 $\pm$ 0.072   | 0.056 $\pm$ 0.018  |
| Bornyl acetate                 | 21.71           | 0.288 $\pm$ 0.174                                          | 0.721 $\pm$ 0.476   | 0.779 $\pm$ 0.501   | 0.325 $\pm$ 0.178  |
| <i>Sesquiterpenes</i>          |                 |                                                            |                     |                     |                    |
| $\beta$ -Caryophyllene         | 24.85           | 0.007 $\pm$ 0.004                                          | 0.000 $\pm$ 0.000   | 0.006 $\pm$ 0.004   | 0.001 $\pm$ 0.001  |
| Germacrene-4-ol                | 26.91           | 2.574 $\pm$ 1.382                                          | 3.005 $\pm$ 1.668   | 1.405 $\pm$ 0.491   | 1.372 $\pm$ 0.572  |
| <i>Diterpenes</i>              |                 |                                                            |                     |                     |                    |
| Epi-13-manool                  | 23.4            | 7.779 $\pm$ 3.364                                          | 10.623 $\pm$ 3.266  | 3.709 $\pm$ 1.642   | 4.952 $\pm$ 1.761  |

Table S5: Relative amounts (mean  $\pm$  SE, n=10) of volatiles from uninfected bark detected after various time periods (0, 14, 28 and 42 days) from the beginning of an experiment. Data from the control *O. montium* treatment are presented here.

| <i>O. montium</i>              |                 | Concentrations of compounds (ng per mg dry weight of bark) |                     |                    |                    |
|--------------------------------|-----------------|------------------------------------------------------------|---------------------|--------------------|--------------------|
| <i>Monoterpenes</i>            | RT <sup>#</sup> | Week 0                                                     | Week 2              | Week 4             | Week 6             |
| $\alpha$ -Pinene               | 9.240           | 1.060 $\pm$ 0.442                                          | 12.922 $\pm$ 2.750  | 7.571 $\pm$ 1.868  | 10.412 $\pm$ 6.355 |
| Camphene                       | 9.910           | 0.085 $\pm$ 0.027                                          | 1.926 $\pm$ 0.330   | 0.875 $\pm$ 0.298  | 0.249 $\pm$ 0.093  |
| $\beta$ -Pinene                | 11.090          | 0.773 $\pm$ 0.161                                          | 43.294 $\pm$ 11.255 | 18.546 $\pm$ 7.326 | 4.355 $\pm$ 1.701  |
| $\beta$ -Myrcene               | 11.640          | 0.230 $\pm$ 0.047                                          | 5.400 $\pm$ 0.909   | 2.371 $\pm$ 0.745  | 0.664 $\pm$ 0.190  |
| 3-Carene                       | 12.360          | 2.522 $\pm$ 1.127                                          | 63.853 $\pm$ 14.157 | 25.926 $\pm$ 7.179 | 7.758 $\pm$ 2.243  |
| p-Cymene                       | 13.050          | 0.023 $\pm$ 0.007                                          | 0.167 $\pm$ 0.033   | 0.150 $\pm$ 0.033  | 0.054 $\pm$ 0.011  |
| Limonene                       | 13.190          | 0.757 $\pm$ 0.313                                          | 13.448 $\pm$ 4.894  | 7.066 $\pm$ 3.418  | 1.923 $\pm$ 0.984  |
| $\beta$ -Phellandrene          | 13.250          | 8.648 $\pm$ 1.732                                          | 97.719 $\pm$ 22.419 | 48.542 $\pm$ 8.344 | 25.756 $\pm$ 7.314 |
| $\gamma$ -Terpinene            | 14.320          | 0.036 $\pm$ 0.011                                          | 0.639 $\pm$ 0.125   | 0.311 $\pm$ 0.082  | 0.101 $\pm$ 0.027  |
| Terpinolene                    | 15.300          | 0.263 $\pm$ 0.106                                          | 4.968 $\pm$ 1.102   | 2.360 $\pm$ 0.691  | 0.609 $\pm$ 0.169  |
| <i>Oxygenated monoterpenes</i> |                 |                                                            |                     |                    |                    |
| Geranyl acetate                | 11.62           | 1.036 $\pm$ 0.782                                          | 0.982 $\pm$ 0.648   | 0.938 $\pm$ 0.540  | 0.627 $\pm$ 0.298  |
| Camphor                        | 11.92           | 0.002 $\pm$ 0.001                                          | 0.023 $\pm$ 0.012   | 0.007 $\pm$ 0.003  | 0.002 $\pm$ 0.001  |
| $\beta$ -ocimene               | 13.9            | 0.004 $\pm$ 0.004                                          | 0.002 $\pm$ 0.002   | 0.001 $\pm$ 0.001  | 0.005 $\pm$ 0.001  |
| Borneol                        | 18.3            | 0.011 $\pm$ 0.003                                          | 0.071 $\pm$ 0.022   | 0.032 $\pm$ 0.012  | 0.009 $\pm$ 0.003  |
| Terpinen-4-ol                  | 18.6            | 0.008 $\pm$ 0.002                                          | 0.071 $\pm$ 0.019   | 0.063 $\pm$ 0.013  | 0.028 $\pm$ 0.007  |
| $\alpha$ -Terpineol            | 19.03           | 0.020 $\pm$ 0.008                                          | 0.167 $\pm$ 0.050   | 0.119 $\pm$ 0.043  | 0.044 $\pm$ 0.016  |
| Bornyl acetate                 | 21.71           | 0.167 $\pm$ 0.108                                          | 0.455 $\pm$ 0.306   | 0.241 $\pm$ 0.104  | 0.144 $\pm$ 0.073  |
| <i>Sesquiterpenes</i>          |                 |                                                            |                     |                    |                    |
| $\beta$ -Caryophyllene         | 24.85           | 0.006 $\pm$ 0.005                                          | 0.000 $\pm$ 0.000   | 0.004 $\pm$ 0.004  | 0.004 $\pm$ 0.003  |
| Germacrene-4-ol                | 26.91           | 3.271 $\pm$ 2.105                                          | 2.973 $\pm$ 1.877   | 2.511 $\pm$ 1.436  | 1.790 $\pm$ 0.857  |
| <i>Diterpenes</i>              |                 |                                                            |                     |                    |                    |
| Epi-13-manool                  | 23.4            | 6.207 $\pm$ 2.451                                          | 7.840 $\pm$ 4.578   | 3.608 $\pm$ 1.369  | 3.055 $\pm$ 1.847  |
