# Supplementary material for: Bark Beetles Utilize Ophiostomatoid Fungi to Circumvent Host Tree Defenses
Source: MDPI journal article supplement (doi:10.3390/metabo13020239), 2023-02-06
Supplement: s1 [file s1]

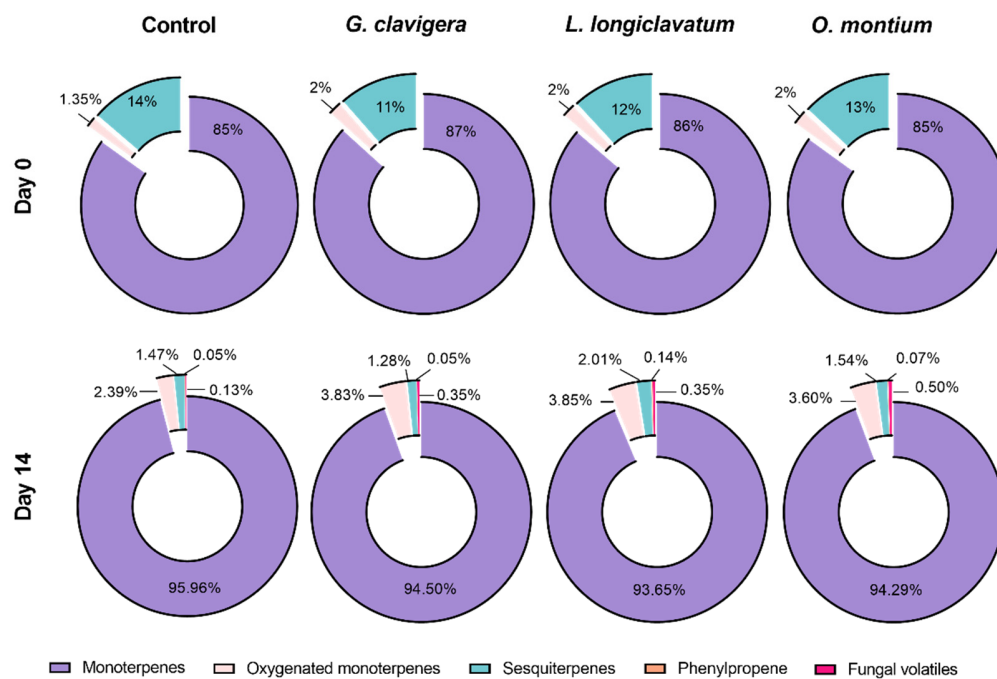

Figure S1: Pie chart representing the chemical composition of *Pinus contorta* phloem (cut logs) before and after 14 days of fungal inoculation.
